# Supplementary material
Source: ML conference proceedings conference paper supplement (https://proceedings.neurips.cc/paper_files/paper/2016/hash/806beafe154032a5b818e97b4420ad98-Abstract.html)
Supplement: Supplementary file [file 806beafe154032a5b818e97b4420ad98-Supplemental.zip]

---

# Supplementary Material to Structured Matrix Recovery via the Generalized Dantzig Selector

---

**Sheng Chen**      **Arindam Banerjee**  
 Dept. of Computer Science & Engineering  
 University of Minnesota, Twin Cities  
 {shengc, banerjee}@cs.umn.edu

## 1 Proof of Theorem 1

**Statement of Theorem:** Define the set  $\mathcal{E}_R(\Theta^*) = \text{cone}\{\Delta \mid R(\Delta + \Theta^*) \leq R(\Theta^*)\}$ . Assume the following conditions hold for  $\lambda_n$  and  $\mathbf{X}$ ,

$$\lambda_n \geq R^* \left( \sum_{i=1}^n \omega_i X_i \right), \quad (\text{S.1})$$

$$\sum_{i=1}^n \langle \langle X_i, \Delta \rangle \rangle^2 / \|\Delta\|_F^2 \geq \alpha > 0, \quad \forall \Delta \in \mathcal{E}_R(\Theta^*). \quad (\text{S.2})$$

The estimation  $\|\hat{\Theta} - \Theta^*\|_F$  error satisfies

$$\|\hat{\Theta} - \Theta^*\|_F \leq \frac{2\Psi_R(\Theta^*) \cdot \lambda_n}{\alpha}, \quad (\text{S.3})$$

where  $\Psi_R(\cdot)$  is the restricted compatibility constant defined as

$$\Psi_R(\Theta^*) = \sup_{\Delta \in \mathcal{E}_R(\Theta^*)} \frac{R(\Delta)}{\|\Delta\|_F} \quad (\text{S.4})$$

*Proof:* Since  $\lambda_n$  satisfies the condition (S.1) and  $\omega_i = y_i - \langle \langle X_i, \Theta^* \rangle \rangle$ , we have

$$R^* \left( \sum_{i=1}^n (\langle \langle X_i, \Theta^* \rangle \rangle - y_i) X_i \right) \leq \lambda_n,$$

which indicates that the constraint set in (3) is feasible, thus

$$R^* \left( \sum_{i=1}^n (\langle \langle X_i, \hat{\Theta} \rangle \rangle - y_i) X_i \right) \leq \lambda_n.$$

Using triangular inequality, one has

$$R^* \left( \sum_{i=1}^n \langle \langle X_i, \hat{\Theta} - \Theta^* \rangle \rangle \cdot X_i \right) \leq 2\lambda_n.$$

Denote  $\hat{\Theta} - \Theta^*$  by  $\Delta$ , and by the definition of dual norm, we get

$$\sum_{i=1}^n \langle \langle X_i, \Delta \rangle \rangle^2 = \langle \langle \Delta, \sum_{i=1}^n \langle \langle X_i, \Delta \rangle \rangle \cdot X_i \rangle \rangle \leq R(\Delta) \cdot R^* \left( \sum_{i=1}^n \langle \langle X_i, \hat{\Theta} - \Theta^* \rangle \rangle \cdot X_i \right) \leq 2\lambda_n R(\Delta).$$

On the other hand, the objective function in (3) implies that  $R(\hat{\Theta}) \leq R(\Theta^*)$ . Therefore the error vector  $\Delta$  must belong to the set  $\mathcal{E}_R(\Theta^*)$ . Using condition (S.2), we obtain

$$\begin{aligned}\alpha \|\Delta\|_F^2 &\leq \sum_{i=1}^n \langle \langle X_i, \Delta \rangle \rangle^2 \leq 2\lambda_n R(\Delta), \\ \|\Delta\|_F &\leq \frac{2\lambda_n}{\alpha} \frac{R(\Delta)}{\|\Delta\|_F} \leq \frac{2\Psi_R(\Theta^*) \cdot \lambda_n}{\alpha},\end{aligned}$$

which complete the proof.  $\blacksquare$

## 2 Proof of Lemma 2

**Statement of Lemma:** Assume that  $\text{rank}(\Theta^*) = r$  and its compact SVD is given by  $\Theta^* = U\Sigma V^T$ , where  $U \in \mathbb{R}^{d \times r}$ ,  $\Sigma \in \mathbb{R}^{r \times r}$  and  $V \in \mathbb{R}^{p \times r}$ . Let  $\theta^*$  be any subgradient of  $f(\sigma^*)$ ,  $w = [\theta_1^*, \theta_2^*, \dots, \theta_r^*, 0, \dots, 0]^T \in \mathbb{R}^d$ ,  $z = [\theta_{r+1}^*, \theta_{r+2}^*, \dots, \theta_d^*, 0, \dots, 0]^T \in \mathbb{R}^d$ ,  $\mathcal{U} = \text{colsp}(U)$  and  $\mathcal{V} = \text{rowsp}(V^T)$ , and define  $\mathcal{M}_1, \mathcal{M}_2$  as

$$\begin{aligned}\mathcal{M}_1 &= \{\Theta \mid \text{colsp}(\Theta) \subseteq \mathcal{U}, \text{rowsp}(\Theta) \subseteq \mathcal{V}\}, \\ \mathcal{M}_2 &= \{\Theta \mid \text{colsp}(\Theta) \subseteq \mathcal{U}^\perp, \text{rowsp}(\Theta) \subseteq \mathcal{V}^\perp\},\end{aligned}$$

where  $\mathcal{U}^\perp, \mathcal{V}^\perp$  are orthogonal complements of  $\mathcal{U}$  and  $\mathcal{V}$  respectively. Then the specified subspace spectral OWL seminorm  $\|\cdot\|_{w,z}$  satisfies

$$\mathcal{E}_R(\Theta^*) \subseteq \mathcal{E}' \triangleq \text{cone}\{\Delta \mid \|\Delta + \Theta^*\|_{w,z} \leq \|\Theta^*\|_{w,z}\}$$

*Proof:* Both  $\mathcal{E}_R(\Theta^*)$  and  $\mathcal{E}'$  are induced by scaled (semi)norm balls (i.e.,  $\Omega_R$  and  $\Omega_{w,z}$ ) centered at  $-\Theta^*$ , and note that

$$\Theta_{\mathcal{M}_1}^* = \Theta^*, \quad \Theta_{\mathcal{M}_2}^* = 0.$$

Thus we obtain

$$\|\Theta^*\|_{w,z} = \|\Theta_{\mathcal{M}_1}^*\|_w = \sum_{i=1}^r \sigma_i^* \theta_i^* = \langle \sigma^*, \theta^* \rangle = R(\Theta^*),$$

which indicates that the two balls have the same radius. Hence we only need to show that  $\|\cdot\|_{w,z} \leq R(\cdot)$ . For any  $\Delta \in \mathbb{R}^{d \times p}$ , assume that the SVD of  $\Delta_{\mathcal{M}_1}$  and  $\Delta_{\mathcal{M}_2}$  are given by  $\Delta_{\mathcal{M}_1} = U_1 \Sigma_1 V_1^T$  and  $\Delta_{\mathcal{M}_2} = U_2 \Sigma_2 V_2^T$ . The corresponding vectors of singular values are in the form of  $\sigma' = [\sigma'_1, \sigma'_2, \dots, \sigma'_r, 0, \dots, 0]^T, \sigma'' = [\sigma''_1, \sigma''_2, \dots, \sigma''_{d-r}, 0, \dots, 0]^T \in \mathbb{R}^d$ , as  $\text{rank}(\Delta_{\mathcal{M}_1}) \leq r$  and  $\text{rank}(\Delta_{\mathcal{M}_2}) \leq d - r$ . Then we have

$$\|\Delta\|_{w,z} = \|\Delta_{\mathcal{M}_1}\|_w + \|\Delta_{\mathcal{M}_2}\|_z = \langle \sigma', w \rangle + \langle \sigma'', z \rangle = \left\langle \theta^*, \begin{bmatrix} \sigma'_{1:r} \\ \sigma''_{1:d-r} \end{bmatrix} \right\rangle = \langle \langle \Theta, \Delta \rangle \rangle,$$

where  $\Theta = U_1 \text{Diag}(\theta_{1:r}^*) V_1 + U_2 \text{Diag}(\theta_{r+1:n}^*) V_2$ . From this construction, we can see that  $\theta^*$  are the singular values of  $\Theta$ , thus  $R^*(\Theta) \leq 1$ . It follows that

$$\langle \langle \Theta, \Delta \rangle \rangle \leq \max_{R^*(Z) \leq 1} \langle \langle Z, \Delta \rangle \rangle = R(\Delta),$$

which completes the proof.  $\blacksquare$

## 3 Proof of Theorem 3

**Statement of Theorem:** Assume there exist  $\eta_1$  and  $\eta_2$  such that the symmetric gauge  $f$  associated with  $R(\cdot)$  satisfies

$$f(\delta) \leq \max\{\eta_1 \|\delta\|_1, \eta_2 \|\delta\|_2\} \quad (\text{S.5})$$

for any  $\delta \in \mathbb{R}^d$ . Then given a rank- $r$   $\Theta^*$ , the restricted compatibility constant  $\Psi_R(\Theta^*)$  can be upper bounded by

$$\Psi_R(\Theta^*) \leq 2\Phi_f(r) + \max \{ \eta_2, \eta_1(1 + \rho)\sqrt{r} \}, \quad (\text{S.6})$$

where  $\Phi_f(r) = \sup_{\|\delta\|_0 \leq r} \frac{f(\delta)}{\|\delta\|_2}$  is called sparse compatibility constant.

*Proof:* Under the setting of Lemma 2, as  $\Theta^* \in \mathcal{M}_1$ , we have

$$\begin{aligned} \|\Delta + \Theta^*\|_{w,z} &\leq \|\Theta^*\|_{w,z} \implies \|\Delta_{\mathcal{M}_1} + \Theta^*\|_w + \|\Delta_{\mathcal{M}_2}\|_z \leq \|\Theta^*\|_w \implies \\ &-\|\Delta_{\mathcal{M}_1}\|_w + \|\Theta^*\|_w + \|\Delta_{\mathcal{M}_2}\|_z \leq \|\Theta^*\|_w \implies \|\Delta_{\mathcal{M}_2}\|_z \leq \|\Delta_{\mathcal{M}_1}\|_w. \end{aligned}$$

As the set  $\{\Delta \mid \|\Delta_{\mathcal{M}_2}\|_z \leq \|\Delta_{\mathcal{M}_1}\|_w\}$  itself is a cone, we obtain

$$\mathcal{E}' \subseteq \{\Delta \mid \|\Delta_{\mathcal{M}_2}\|_z \leq \|\Delta_{\mathcal{M}_1}\|_w\}$$

Define  $\mathcal{M}^\perp$  as the orthogonal complement of  $\mathcal{M}_1 \oplus \mathcal{M}_2$ . By the definition and Lemma 2, we have

$$\begin{aligned} \Psi_R(\Theta^*) &= \sup_{\Delta \in \mathcal{E}_R(\Theta^*)} \frac{R(\Delta)}{\|\Delta\|_F} \leq \sup_{\Delta \in \mathcal{E}'} \frac{R(\Delta)}{\|\Delta\|_F} \leq \sup_{\|\Delta_{\mathcal{M}_2}\|_z \leq \|\Delta_{\mathcal{M}_1}\|_w} \frac{R(\Delta)}{\|\Delta\|_F} \\ &\leq \sup_{\|\Delta_{\mathcal{M}_2}\|_z \leq \|\Delta_{\mathcal{M}_1}\|_w} \frac{R(\Delta_{\mathcal{M}^\perp}) + R(\Delta_{\mathcal{M}_1} + \Delta_{\mathcal{M}_2})}{\|\Delta\|_F} \\ &\leq \sup_{\Delta \in \mathcal{M}^\perp} \frac{R(\Delta)}{\|\Delta\|_F} + \sup_{\substack{\|\Delta_{\mathcal{M}_2}\|_{\text{tr}} \\ \|\Delta_{\mathcal{M}_1}\|_{\text{tr}} \leq \rho}} \frac{R(\Delta_{\mathcal{M}_1} + \Delta_{\mathcal{M}_2})}{\|\Delta\|_F} \end{aligned}$$

It is not difficult to see that any  $\Delta \in \mathcal{M}^\perp$  has rank at most  $2r$ , thus

$$\sup_{\Delta \in \mathcal{M}^\perp} \frac{R(\Delta)}{\|\Delta\|_F} = \sup_{\Delta \in \mathcal{M}^\perp} \frac{f(\sigma(\Delta))}{\|\sigma(\Delta)\|_2} \leq \sup_{\|\delta\|_0 \leq 2r} \frac{f(\delta)}{\|\delta\|_2} \leq 2 \sup_{\|\delta\|_0 \leq r} \frac{f(\delta)}{\|\delta\|_2} = 2\Phi_f(r).$$

Using (S.5) and  $\|\Delta_{\mathcal{M}_1} + \Delta_{\mathcal{M}_2}\|_F \leq \|\Delta\|_F$ , we have

$$\begin{aligned} \sup_{\substack{\|\Delta_{\mathcal{M}_2}\|_{\text{tr}} \\ \|\Delta_{\mathcal{M}_1}\|_{\text{tr}} \leq \rho}} \frac{R(\Delta_{\mathcal{M}_1} + \Delta_{\mathcal{M}_2})}{\|\Delta\|_F} &\leq \sup_{\substack{\|\Delta_{\mathcal{M}_2}\|_{\text{tr}} \\ \|\Delta_{\mathcal{M}_1}\|_{\text{tr}} \leq \rho}} \frac{\max \{ \eta_2 \|\Delta\|_F, \eta_1 \|\Delta_{\mathcal{M}_1} + \Delta_{\mathcal{M}_2}\|_{\text{tr}} \}}{\|\Delta\|_F} \\ &\leq \max \left\{ \eta_2, \sup_{\Delta \in \mathcal{M}_1} \frac{\eta_1(1 + \rho) \|\Delta\|_{\text{tr}}}{\|\Delta\|_F} \right\} \\ &\leq \max \{ \eta_2, \eta_1(1 + \rho)\sqrt{r} \}, \end{aligned}$$

where the last inequality uses the fact that any  $\Delta \in \mathcal{M}_1$  is at most rank- $r$ , and  $\|\delta\|_1 \leq \sqrt{r}\|\delta\|_2$  for any  $r$ -sparse vector  $\delta$ . Combining all the inequalities, we complete the proof.  $\blacksquare$

## 4 Properties of Gaussian Random Matrix

To facilitate the computation of Gaussian width, especially the proof of Theorem 6, we will use some properties specific to the Gaussian random matrix  $G \in \mathbb{R}^{d \times p}$ , which are summarized as follows. The symbol “ $\sim$ ” means “has the same distribution as”.

**Property 1:** Given an  $m$ -dimensional subspace  $\mathcal{M} \subseteq \mathbb{R}^{d \times p}$  spanned by orthonormal basis  $U_1, \dots, U_m$ ,

$$G_{\mathcal{M}} \sim \sum_{i=1}^m g_i U_i,$$

where  $g_i$ 's are i.i.d. standard Gaussian random variables. Moreover,  $\mathbb{E} [\|G_{\mathcal{M}}\|_F^2] = m$ .

*Proof:* Given the orthonormal basis  $U_1, \dots, U_m$  of subspace  $\mathcal{M}$ ,  $G_{\mathcal{M}}$  can be written as

$$G_{\mathcal{M}} = \sum_{i=1}^m \langle \langle G, U_i \rangle \rangle \cdot U_i$$

Since  $\|U_1\|_F = \dots = \|U_m\|_F = 1$ , each  $\langle\langle G, U_i \rangle\rangle$  is standard Gaussian. Moreover, as  $U_1, \dots, U_m$  are orthogonal,  $\langle\langle G, U_i \rangle\rangle$  are independent of each other. ■

**Property 2:**  $G_{\mathcal{M}_1}$  and  $G_{\mathcal{M}_2}$  are independent if  $\mathcal{M}_1, \mathcal{M}_2 \subseteq \mathbb{R}^{d \times p}$  are orthogonal subspaces.

*Proof:* Suppose that the orthonormal bases of  $\mathcal{M}_1, \mathcal{M}_2$  are given by  $U_1, \dots, U_{m_1}$  and  $V_1, \dots, V_{m_2}$  respectively. Using Property 1 above,  $G_{\mathcal{M}_1}$  and  $G_{\mathcal{M}_2}$  can be written as

$$\begin{aligned} G_{\mathcal{M}_1} &= \sum_{i=1}^{m_1} \langle\langle G, U_i \rangle\rangle \cdot U_i \sim \sum_{i=1}^{m_1} g_i U_i, \\ G_{\mathcal{M}_2} &= \sum_{i=1}^{m_2} \langle\langle G, V_i \rangle\rangle \cdot V_i \sim \sum_{i=1}^{m_2} h_i V_i, \end{aligned}$$

where  $g_1, \dots, g_{m_1}$  and  $h_1, \dots, h_{m_2}$  are all standard Gaussian. As  $\mathcal{M}_1, \mathcal{M}_2 \subseteq \mathbb{R}^{d \times p}$  are orthogonal,  $U_1, \dots, U_{m_1}$  and  $V_1, \dots, V_{m_2}$  are orthogonal to each other as well, which implies that  $g_1, \dots, g_{m_1}$  and  $h_1, \dots, h_{m_2}$  are all independent. Therefore  $G_{\mathcal{M}_1}$  and  $G_{\mathcal{M}_2}$  are independent. ■

**Property 3:** Given a subspace

$$\mathcal{M} = \{\Theta \in \mathbb{R}^{d \times p} \mid \text{colsp}(\Theta) \subseteq \mathcal{U}, \text{rowsp}(\Theta) \subseteq \mathcal{V}\},$$

where  $\mathcal{U} \subseteq \mathbb{R}^d, \mathcal{V} \subseteq \mathbb{R}^p$  are two subspaces of dimension  $m_1$  and  $m_2$  respectively, then  $\|G_{\mathcal{M}}\|_{\text{op}}$  satisfies

$$\|G_{\mathcal{M}}\|_{\text{op}} \sim \|G'\|_{\text{op}},$$

where  $G'$  is an  $m_1 \times m_2$  matrix with i.i.d. standard Gaussian entries.

*Proof:* Suppose that the orthonormal bases for  $\mathcal{U}$  and  $\mathcal{V}$  are  $U = [u_1, \dots, u_{m_1}]$  and  $V = [v_1, \dots, v_{m_2}]$  respectively, and  $U_{\perp}$  and  $V_{\perp}$  denote the orthonormal bases for their orthogonal complement. It is easy to see that the orthonormal basis for  $\mathcal{M}$  can be given by  $\{u_i v_j^T \mid 1 \leq i \leq m_1, 1 \leq j \leq m_2\}$ . Using Property 1, we have

$$G_{\mathcal{M}} \sim \sum_{i=1}^{m_1} \sum_{j=1}^{m_2} g'_{ij} u_i v_j^T = U G' V = [U, U_{\perp}] \cdot \begin{bmatrix} G' & 0_{m_1 \times (p-m_2)} \\ 0_{(d-m_1) \times m_2} & 0_{(d-m_1) \times (p-m_2)} \end{bmatrix} \cdot \begin{bmatrix} V^T \\ V_{\perp}^T \end{bmatrix}$$

where  $G'$  is a  $m_1 \times m_2$  standard Gaussian random matrix. Note that both  $[U, U_{\perp}] \in \mathbb{R}^{d \times d}$  and  $[V, V_{\perp}] \in \mathbb{R}^{p \times p}$  are unitary matrices, because they form the orthonormal bases for  $\mathbb{R}^d$  and  $\mathbb{R}^p$  respectively. If we denote  $\begin{bmatrix} G' & 0 \\ 0 & 0 \end{bmatrix}$  by  $W$ , then  $\|G_{\mathcal{M}}\|_{\text{op}} = \|W\|_{\text{op}}$  as spectral norm is unitarily invariant. Further, if the SVD of  $G'$  is  $G' = U_1 \Sigma_1 V_1^T$ , where  $U_1 \in \mathbb{R}^{m_1 \times m_1}, \Sigma_1 \in \mathbb{R}^{m_1 \times m_2}$  and  $V_1 \in \mathbb{R}^{m_2 \times m_2}$ , then the SVD of  $W$  is given by

$$W = \begin{bmatrix} U_1 & 0_{m_1 \times (d-m_1)} \\ 0_{(d-m_1) \times m_1} & U_2 \end{bmatrix} \begin{bmatrix} \Sigma_1 & 0_{m_1 \times (p-m_2)} \\ 0_{(d-m_1) \times m_2} & 0_{(d-m_1) \times (p-m_2)} \end{bmatrix} \begin{bmatrix} V_1^T & 0_{m_2 \times (p-m_2)} \\ 0_{(p-m_2) \times m_2} & V_2^T \end{bmatrix},$$

where  $U_2 \in \mathbb{R}^{(d-m_1) \times (d-m_1)}$  and  $V_2 \in \mathbb{R}^{(p-m_2) \times (p-m_2)}$  are arbitrary unitary matrices. From the equation above, we can see that  $W$  and  $G'$  share the same singular values, thus  $\|G_{\mathcal{M}}\|_{\text{op}} = \|W\|_{\text{op}} = \|G'\|_{\text{op}}$ . ■

**Property 4:** The operator norm  $\|G\|_{\text{op}}$  satisfies

$$\mathbb{P} \left( \|G\|_{\text{op}} \geq \sqrt{d} + \sqrt{p} + \epsilon \right) \leq \exp \left( -\frac{\epsilon^2}{2} \right), \quad (\text{S.7})$$

$$\mathbb{E} [\|G\|_{\text{op}}] \leq \sqrt{d} + \sqrt{p}, \quad (\text{S.8})$$

$$\mathbb{E} [\|G\|_{\text{op}}^2] \leq \left( \sqrt{d} + \sqrt{p} \right)^2 + 2. \quad (\text{S.9})$$

(S.7) and (S.8) are the classical results on the extreme singular value of Gaussian random matrix [4, 5] (see Theorem 5.32 and Corollary 5.35 in [5]). (S.9) is used in [2] (see (82) - (87) in [2]).

**Property 5:** For a subset of unit sphere  $\mathcal{A} \subseteq \mathbb{S}^{dp-1}$ , A useful inequality [2, 1] is given by the Gaussian width satisfies

$$w^2(\mathcal{A}) \leq \mathbb{E}_G \left[ \inf_{Z \in \mathcal{N}} \|G - Z\|_F^2 \right], \quad (\text{S.10})$$

in which  $\mathcal{N} = \{Z \mid \langle Z, \Delta \rangle \leq 0 \text{ for all } \Delta \in \mathcal{A}\}$  is the polar cone of  $\text{cone}(\mathcal{A})$ .

This property is essentially Proposition 10.2 in [1], and the right-hand side is often called *statistical dimension*.

## 5 Proof of Theorem 6

**Statement of Theorem:** Under the setting of Lemma 2, let  $\rho = \theta_{\max}^* / \theta_{\min}^*$  and  $\text{rank}(\Theta^*) = r$ . The Gaussian width  $w(\mathcal{A}_R(\Theta^*))$  satisfies

$$w(\mathcal{A}_R(\Theta^*)) \leq \min \left\{ \sqrt{dp}, \sqrt{(2\rho^2 + 1)(d + p - r)r} \right\}. \quad (\text{S.11})$$

*Proof:* For simplicity, we use  $\mathcal{A}$  as shorthand for  $\mathcal{A}_R(\Theta^*)$ . Let  $\theta^*$  be any subgradient of  $f(\cdot)$  at  $\sigma^*$ , i.e.,  $\theta^* \in \partial f(\sigma^*)$ , and  $\Gamma = U \text{Diag}(\theta_{1:r}^*) V$ . We define

$$\mathcal{D} = \{W \mid W \in \mathcal{M}_2, \sigma(W) \preceq z\}, \quad \mathcal{K} = \{\Gamma + W \mid W \in \mathcal{D}\},$$

where the symbol “ $\preceq$ ” means “elementwise less than or equal”. It is not difficult to see that  $\mathcal{K}$  is a subset of  $\partial R(\Theta^*)$ , as any  $Z \in \mathcal{K}$  satisfies  $R^*(Z) = f^*(\sigma(Z)) \leq f^*(\theta^*) = 1$  and  $\langle Z, \Theta^* \rangle = \langle \sigma(Z), \sigma^* \rangle = \langle \theta_{1:r}^*, \sigma_{1:r}^* \rangle = f(\sigma^*) = R(\Theta^*)$ . Hence we have

$$\text{cone}(\mathcal{K}) \subset \text{cone}\{\partial R(\Theta^*)\} = \mathcal{N},$$

where  $\mathcal{N}$  is the polar cone of  $\mathcal{E}_R(\Theta^*)$ , and the equality follows from the Theorem 23.7 of [3]. We define the subspace  $\mathcal{M}^\perp$  as the orthogonal complement of  $\mathcal{M}_1 \oplus \mathcal{M}_2$ . For the sake of convenience, we denote by  $G_1$  ( $G_2$ ,  $G_\perp$ ) the orthogonal projection of  $G$  onto  $\mathcal{M}_1$  ( $\mathcal{M}_2$ ,  $\mathcal{M}_\perp$ ), and denote  $\text{cone}(\mathcal{K})$  by  $\mathcal{C}$ . Using (S.10), we obtain

$$\begin{aligned} w(\mathcal{A})^2 &\leq \mathbb{E} \left[ \inf_{Z \in \mathcal{N}} \|G - Z\|_F^2 \right] \leq \mathbb{E} \left[ \inf_{Z \in \mathcal{C}} \|G_1 - Z_1\|_F^2 + \|G_2 - Z_2\|_F^2 + \|G_\perp - Z_\perp\|_F^2 \right] \\ &= \mathbb{E} \left[ \inf_{t \geq 0, W \in \mathcal{D}} \|G_1 - t\Gamma\|_F^2 + \|G_2 - W\|_F^2 \right] + \mathbb{E} [\|G_\perp\|_F^2]. \end{aligned} \quad (\text{S.12})$$

To further bound the expectations, we let  $t_0 = \|G_2\|_{\text{op}} / \theta_{\min}^*$ , which is a random quantity depending on  $G$ . Therefore, we have

$$\begin{aligned} \mathbb{E} \left[ \inf_{t \geq 0, W \in \mathcal{D}} \|G_1 - t\Gamma\|_F^2 + \|G_2 - W\|_F^2 \right] &\leq \mathbb{E} [\|G_1 - t_0\Gamma\|_F^2] + \mathbb{E} \left[ \inf_{W \in \mathcal{D}} \|G_2 - W\|_F^2 \right] \\ &= \mathbb{E} [\|G_1\|_F^2] + 2\mathbb{E} [\langle G_1, t_0\Gamma \rangle] + \|\theta_{1:r}^*\|_2^2 \cdot \mathbb{E} [t_0^2] + 0 \\ &= r^2 + 0 + \mathbb{E} [\|G_2\|_{\text{op}}^2] \cdot \|\theta_{1:r}^*\|_2^2 / \theta_{\min}^{*2} \\ &\leq r^2 + ((\sqrt{d-r} + \sqrt{p-r})^2 + 2) \cdot \|\theta_{1:r}^*\|_2^2 / \theta_{\min}^{*2} \\ &\leq r^2 + 2\rho^2 r (d + p - 2r), \end{aligned} \quad (\text{S.13})$$

where the second equality uses Property 1 and 2 in Section 4, and the second inequality follows from Property 3 and 4. Since  $\mathcal{M}_\perp$  is a  $r(d + p - 2r)$ -dimensional subspace, by Property 1 we have  $\mathbb{E} [\|G_\perp\|_F^2] = r(d + p - 2r)$ . Combining it with (S.12) and (S.13), we have  $w(\mathcal{A}) \leq \sqrt{(2\rho^2 + 1)(d + p - r)r}$ . On the other hand, as  $\mathcal{A} \subseteq \mathbb{S}^{dp-1}$ , we always have  $w(\mathcal{A}) \leq \mathbb{E} [\|G\|_F] \leq \sqrt{\mathbb{E} [\|G\|_F^2]} = \sqrt{dp}$ . We finish the proof by combining the two bounds for  $w(\mathcal{A})$ . ■

## 6 Proof of Theorem 8

**Statement of Theorem:** Suppose that the symmetric gauge  $f$  associated with  $R(\cdot)$  satisfies  $f(\cdot) \geq \nu \|\cdot\|_1$ . Then the Gaussian width  $w(\Omega_R)$  is upper bounded by

$$w(\Omega_R) \leq \frac{\sqrt{d} + \sqrt{p}}{\nu} \quad (\text{S.14})$$

*Proof:* As  $f(\cdot) \geq \nu \|\cdot\|_1$ , we have

$$R(\cdot) \geq \nu \|\cdot\|_{\text{tr}} \implies \Omega_R \subseteq \Omega_{\nu \|\cdot\|_{\text{tr}}}.$$

Hence it follows that

$$w(\Omega_R) \leq w(\Omega_{\nu \|\cdot\|_{\text{tr}}}) = \frac{w(\Omega_{\|\cdot\|_{\text{tr}}})}{\nu} = \frac{\mathbb{E}\|G\|_{\text{op}}}{\nu} \leq \frac{\sqrt{d} + \sqrt{p}}{\nu},$$

where the last inequality follows from the Property 4 of Gaussian random matrix. ■

## References

- [1] D. Amelunxen, M. Lotz, M. B. McCoy, and J. A. Tropp. Living on the edge: Phase transitions in convex programs with random data. *Inform. Inference*, 3(3):224–294, 2014.
- [2] V. Chandrasekaran, B. Recht, P. A. Parrilo, and A. S. Willsky. The convex geometry of linear inverse problems. *Foundations of Computational Mathematics*, 12(6):805–849, 2012.
- [3] R. T. Rockafellar. *Convex Analysis*. Princeton University Press, 1970.
- [4] M. Rudelson and R. Vershynin. Non-asymptotic theory of random matrices: extreme singular values. In *Proceedings of the International Congress of Mathematicians*, pages 1576–1602, 2010.
- [5] R. Vershynin. Introduction to the non-asymptotic analysis of random matrices. In Y. Eldar and G. Kutyniok, editors, *Compressed Sensing*, chapter 5, pages 210–268. Cambridge University Press, 2012.
